# Supplementary material for: Rational design of orange-red iridium(iii) complexes by an isomer engineering strategy for improved performance of white organic light-emitting diodes
Source: Royal Society of Chemistry journal article supplement (doi:10.1039/d2tc02249d), 2022-01-01
Supplement: d2tc02249d1.pdf [file d2tc02249d1.pdf]

## Electronic Supplementary Information (ESI)

### **Rational design of orange-red iridium(III) complexes by isomer engineering strategy for improved performance of white organic light-emitting diodes**

Yi-Ping Han,<sup>a</sup> Jia-Ming Zhang,<sup>b</sup> Ying-Chen Duan,<sup>a</sup> Li-Li Wen,<sup>\*a</sup> Guan-Yu Ding,<sup>a</sup>  
Kui-Zhan Shao,<sup>c</sup> Guo-Gang Shan,<sup>\*c</sup> Wen-Fa Xie<sup>\*b</sup> and Zhong-Min Su<sup>\*a, c</sup>

*<sup>a</sup> Jilin Provincial science and technology innovation center of optical materials and chemistry, School of Chemistry & Environmental Engineering, Changchun University of Science and Technology, Changchun, Jilin 130022, P. R. China*

E-mail: wll@cust.edu.cn (L. L. Wen); zmsu@nenu.edu.cn (Z. M. Su)

*<sup>b</sup> State Key Laboratory of Integrated Optoelectronics, College of Electronic Science and Engineering, Jilin University, Changchun, Jilin 130012, P. R. China*

Tel: +86-13844907598, E-mail: xiewf@jlu.edu.cn (W. F. Xie)

*<sup>c</sup> Institute of Functional Material Chemistry and National & Local United Engineering Lab for Power Battery, Faculty of Chemistry, Northeast Normal University, Changchun 130024, P. R. China, E-mail: shangg187@nenu.edu.cn (G. G. Shan)*

**List of Contents for Supplementary Information:**

1. **Fig. S1** The synthesized process of ancillary ligand and designed iridium(III) complexes.
2. **Fig. S2**  $^1\text{H}$  NMR spectrum of auxiliary ligand Hpbi.
3. **Fig. S3**  $^1\text{H}$  NMR spectrum of complex **Ir(pq)<sub>2</sub>pbi**.
4. **Fig. S4**  $^1\text{H}$  NMR spectrum of complex **Ir(piq)<sub>2</sub>pbi**.
5. **Fig. S5** Mass spectrum of complex **Ir(pq)<sub>2</sub>pbi**.
6. **Fig. S6** Mass spectrum of complex **Ir(piq)<sub>2</sub>pbi**.
7. **Table S1** Crystallographic summary of single crystals for **Ir(pq)<sub>2</sub>pbi** and **Ir(piq)<sub>2</sub>pbi**.
8. **Table S2** Selected bond lengths and angles for **Ir(pq)<sub>2</sub>pbi** and **Ir(piq)<sub>2</sub>pbi**.
9. **Fig. S7** The packing diagrams of complexes **Ir(pq)<sub>2</sub>pbi** (left) and **Ir(piq)<sub>2</sub>pbi** (right).
10. **Fig. S8** Normalized PL spectra of **Ir(pq)<sub>2</sub>pbi** and **Ir(piq)<sub>2</sub>pbi** in  $\text{CH}_2\text{Cl}_2$  at 77 K.
11. **Fig. S9** CV curves of complexes **Ir(pq)<sub>2</sub>pbi** and **Ir(piq)<sub>2</sub>pbi** in  $\text{CH}_2\text{Cl}_2$ .
12. **Table S3** Excitation energy and major electronic configuration for complexes **Ir(pq)<sub>2</sub>pbi** and **Ir(piq)<sub>2</sub>pbi**.
13. **Fig. S10** TGA curves of complexes **Ir(pq)<sub>2</sub>pbi** and **Ir(piq)<sub>2</sub>pbi**.
14. **Fig. S11** CIE coordinates of devices **D1** and **D2** at 6 V.
15. **Fig. S12** (a) J-V-L curves, inset: EL spectra; (b)  $\eta_c$ -L,  $\eta_p$ -L and  $\eta_{\text{ext}}$ -L curves for device based ir(III) complexes **Ir(pq)<sub>2</sub>acac** or **Ir(piq)<sub>2</sub>acac** [The device structure is ITO/MoO<sub>3</sub> (3 nm)/TAPC (35 nm)/TCTA (5 nm)/26DCzPPy:**Ir(pq)<sub>2</sub>acac** or **Ir(piq)<sub>2</sub>acac** (20 nm)/TmPyPB (55 nm)/LiF (1 nm)/Al].
16. **Table S4** Summary of device performances of **Ir(pq)<sub>2</sub>acac** and **Ir(piq)<sub>2</sub>acac**.
17. **Fig. S13** CIE coordinates of devices **W1** and **W2** at 6 V.
18. **Fig. S14** EL spectra for **W2**.

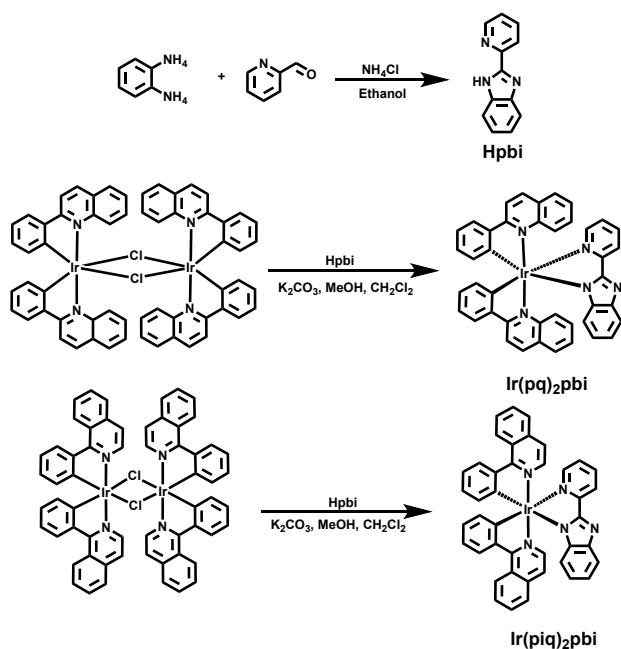

**Fig. S1** The synthesized process of ancillary ligand and designed iridium(III) complexes.

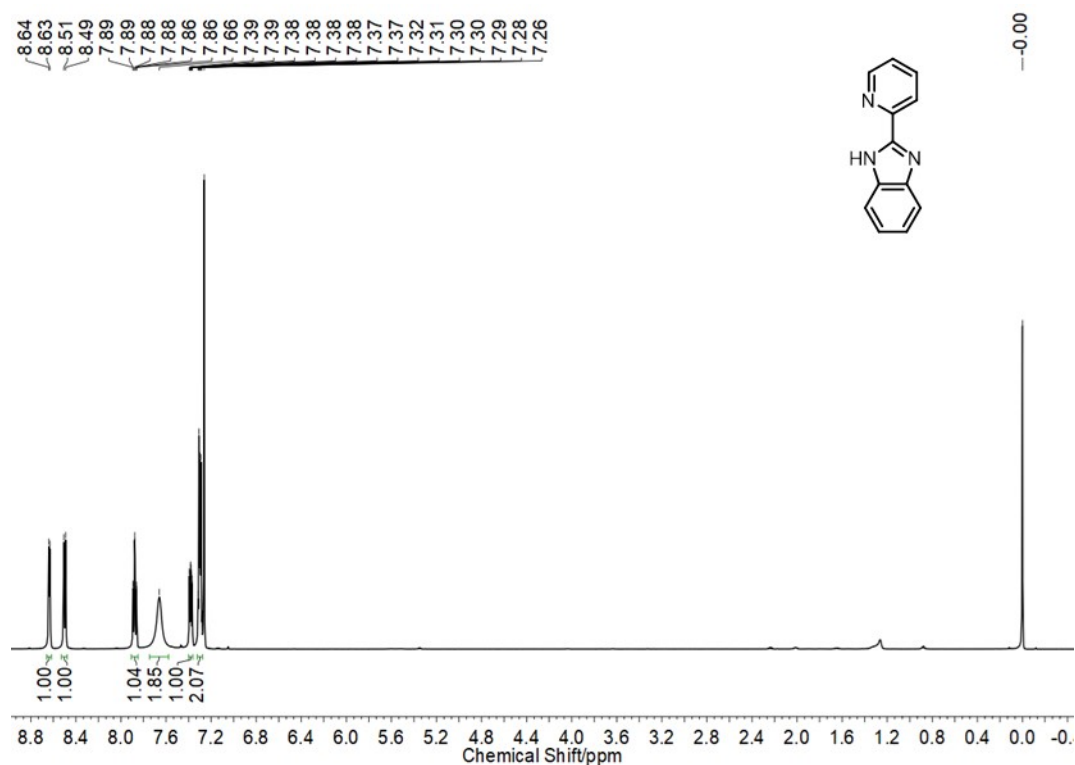

**Fig. S2** <sup>1</sup>H NMR spectrum of auxiliary ligand Hpbi.

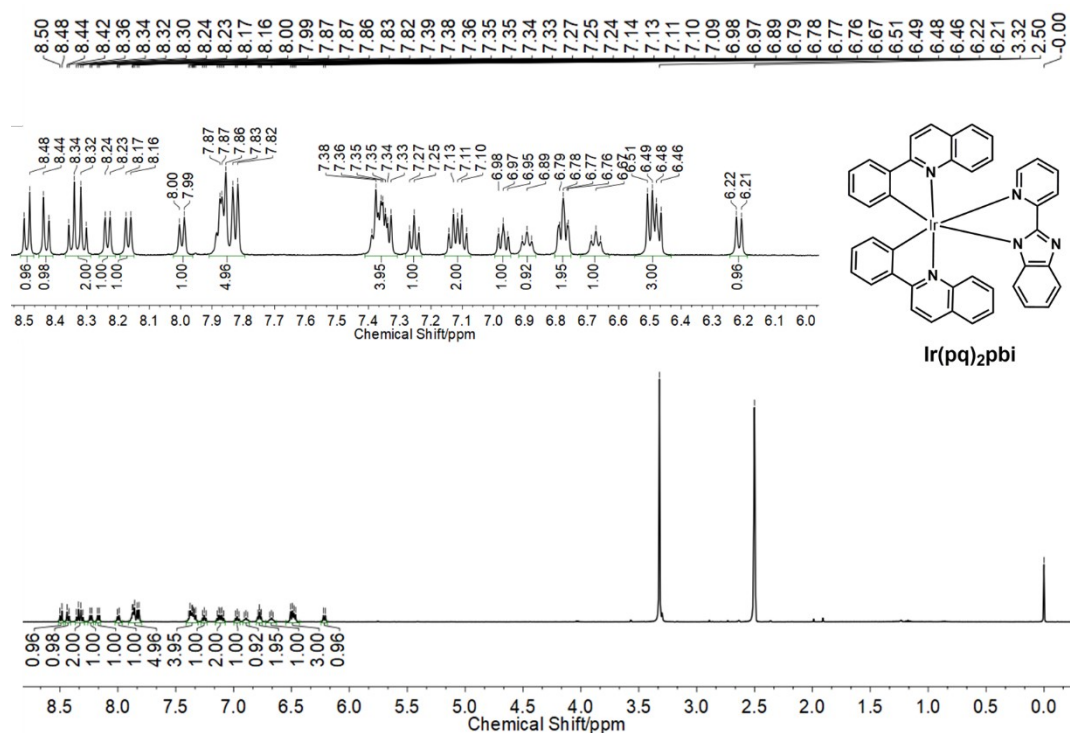

**Fig. S3** <sup>1</sup>H NMR spectrum of complex **Ir(pq)<sub>2</sub>bpi**.

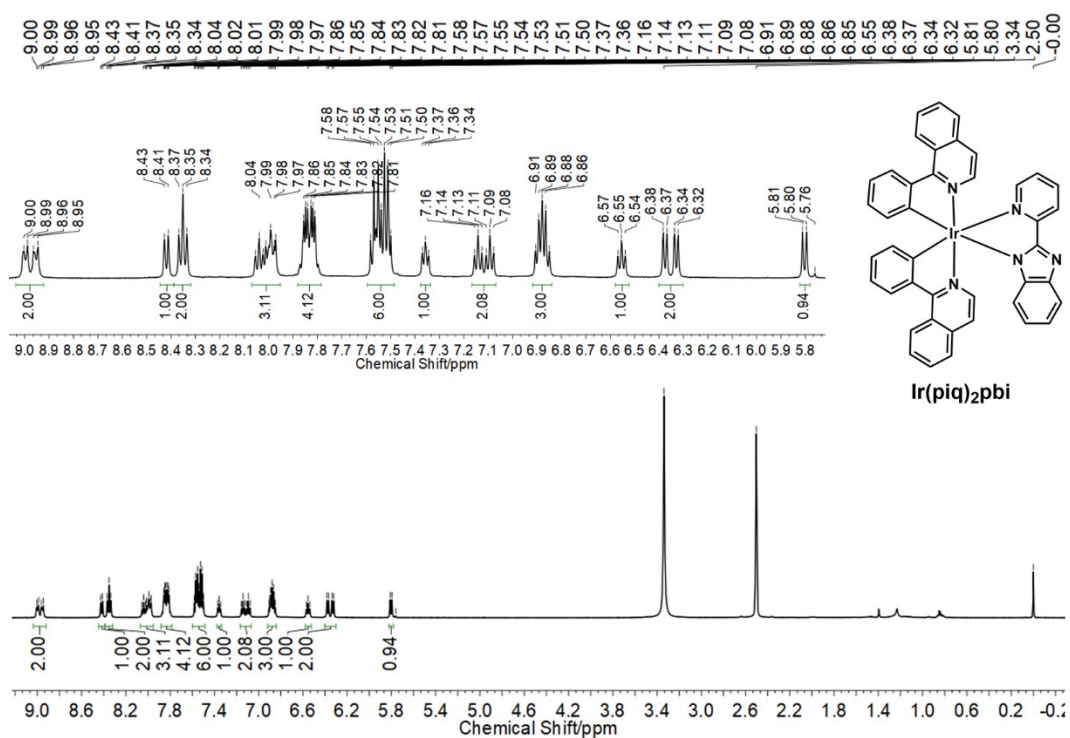

**Fig. S4** <sup>1</sup>H NMR spectrum of complex **Ir(piq)<sub>2</sub>bpi**.

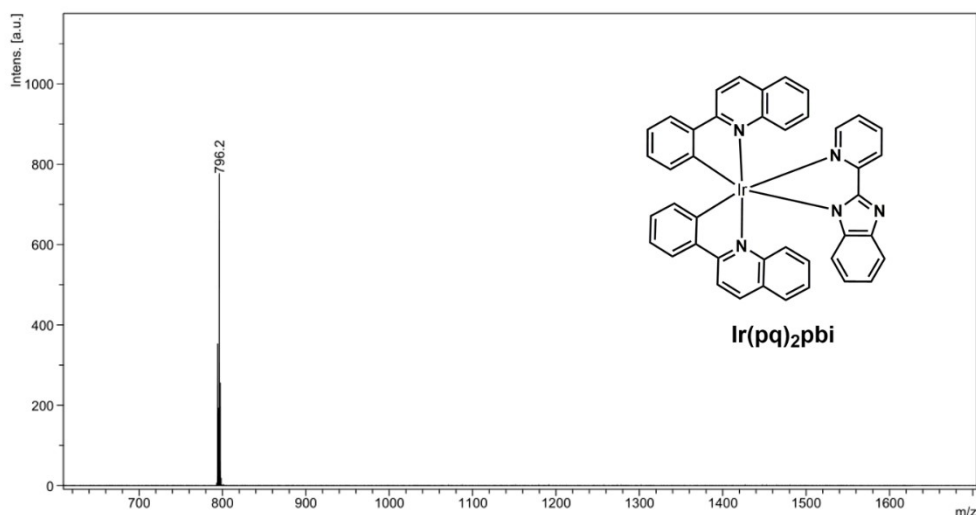

**Fig. S5** Mass spectrum of complex **Ir(pq)<sub>2</sub>pbi**.

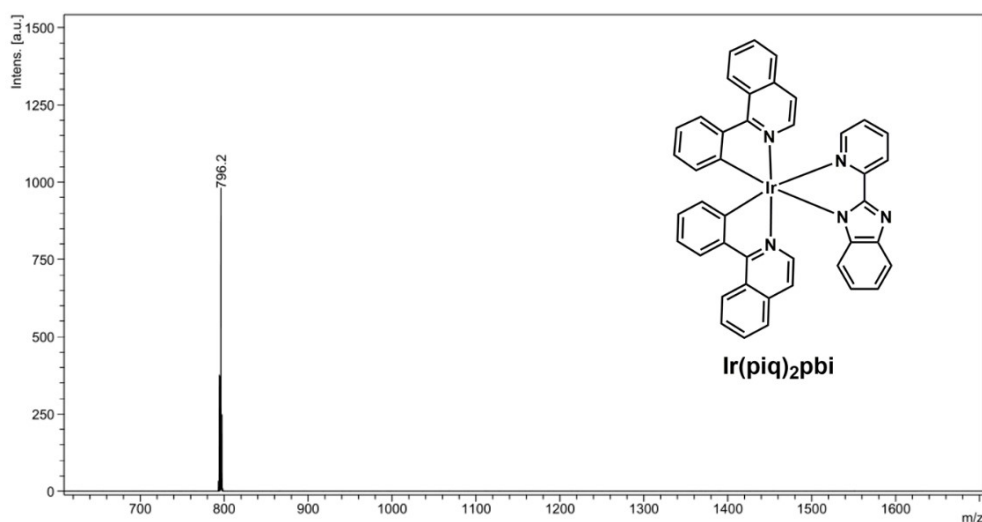

**Fig. S6** Mass spectrum of complex **Ir(piq)<sub>2</sub>pbi**.

**Table S1** Crystallographic summary of single crystals for **Ir(pq)<sub>2</sub>pbi** and **Ir(piq)<sub>2</sub>pbi**.

|                   | <b>Ir(piq)<sub>2</sub>pbi</b>                    | <b>Ir(pq)<sub>2</sub>pbi</b>                     |
|-------------------|--------------------------------------------------|--------------------------------------------------|
| Empirical formula | C <sub>42</sub> H <sub>28</sub> IrN <sub>5</sub> | C <sub>42</sub> H <sub>28</sub> IrN <sub>5</sub> |
| Formula weight    | 795.90                                           | 794.89                                           |
| Temperature/K     | 173.0                                            | 173.0                                            |
| Crystal system    | monoclinic                                       | triclinic                                        |
| Space group       | <i>C2/c</i>                                      | <i>P-1</i>                                       |
| <i>a</i> /Å       | 38.4774(17)                                      | 15.8437(7)                                       |
| <i>b</i> /Å       | 10.4809(5)                                       | 17.0679(7)                                       |
| <i>c</i> /Å       | 19.2732(8)                                       | 17.3454(8)                                       |

|                                          |                                                               |                                                                |
|------------------------------------------|---------------------------------------------------------------|----------------------------------------------------------------|
| $\alpha/^\circ$                          | 90                                                            | 75.672(2)                                                      |
| $\beta/^\circ$                           | 116.6730(10)                                                  | 70.044(2)                                                      |
| $\gamma/^\circ$                          | 90                                                            | 64.469(2)                                                      |
| Volume/ $\text{\AA}^3$                   | 6945.3(5)                                                     | 3950.4(3)                                                      |
| Z                                        | 8                                                             | 4                                                              |
| $\rho_{\text{cal}}$ (g/cm <sup>3</sup> ) | 1.522                                                         | 1.337                                                          |
| $\mu$ (Cu K $\alpha$ )/mm <sup>-1</sup>  | 7.724                                                         | 6.790                                                          |
| $F(000)$                                 | 3144.0                                                        | 1568.0                                                         |
| Reflections collected                    | 29612                                                         | 68833                                                          |
| Independent reflections                  | 5722 [R <sub>int</sub> = 0.0432, R <sub>sigma</sub> = 0.0335] | 13021 [R <sub>int</sub> = 0.0853, R <sub>sigma</sub> = 0.0565] |
| Goodness-of-fit on F <sup>2</sup>        | 1.080                                                         | 1.066                                                          |
| Final R indexes [I >= 2 $\sigma$ (I)]    | R <sub>I</sub> = 0.0269, wR <sub>2</sub> = 0.0725             | R <sub>I</sub> = 0.0558, wR <sub>2</sub> = 0.1424              |
| Final R indexes [all data]               | R <sub>I</sub> = 0.0277, wR <sub>2</sub> = 0.0731             | R <sub>I</sub> = 0.0712, wR <sub>2</sub> = 0.1528              |

$${}^a R_1 = \frac{\sum ||F_o| - |F_c||}{\sum |F_o|}; \quad {}^b wR_2 = \frac{|\sum w(|F_o|^2 - |F_c|^2)|}{\sum w(F_o^2)^{1/2}}$$

**Table S2** Selected bonds lengths and angles for **Ir(pq)<sub>2</sub>pbi** and **Ir(piq)<sub>2</sub>pbi**.

|                 | <b>Ir(pq)<sub>2</sub>pbi</b> | <b>Ir(pq)<sub>2</sub>pbi</b> |
|-----------------|------------------------------|------------------------------|
| Selected bonds  | Bond length ( $\text{\AA}$ ) | Bond length ( $\text{\AA}$ ) |
| Ir-C(1)         | 1.989(8)                     | 1.997(3)                     |
| Ir-C(16)        | 1.959(9)                     | 1.999(3)                     |
| Ir-N(1)         | 2.094(7)                     | 2.039(3)                     |
| Ir-N(2)         | 2.079(7)                     | 2.034(3)                     |
| Ir-N(3)         | 2.170(7)                     | 2.122(3)                     |
| Ir-N(5)         | 2.194(6)                     | 2.174(3)                     |
| Selected angles | ( $^\circ$ )                 | ( $^\circ$ )                 |
| C(1)-Ir-N(1)    | 79.8(3)                      | 79.3(12)                     |
| C(16)-Ir-N(2)   | 79.8(3)                      | 79.7(12)                     |
| N(3)-Ir-N(5)    | 74.8(2)                      | 75.9(10)                     |
| N(1)-Ir-N(2)    | 171.0(3)                     | 172.8(10)                    |
| C(1)-Ir-N(3)    | 169.7(3)                     | 173.9(12)                    |
| C(16)-Ir-N(5)   | 172.8(3)                     | 171.6(12)                    |

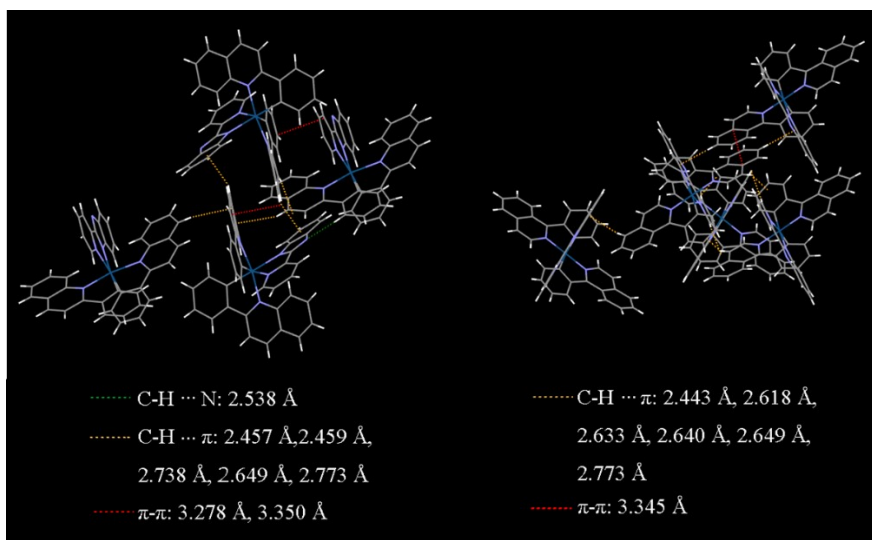

Fig. S7 The packing diagrams of complexes  $\text{Ir}(\text{pq})_2\text{pbi}$  (left) and  $\text{Ir}(\text{piq})_2\text{pbi}$  (right).

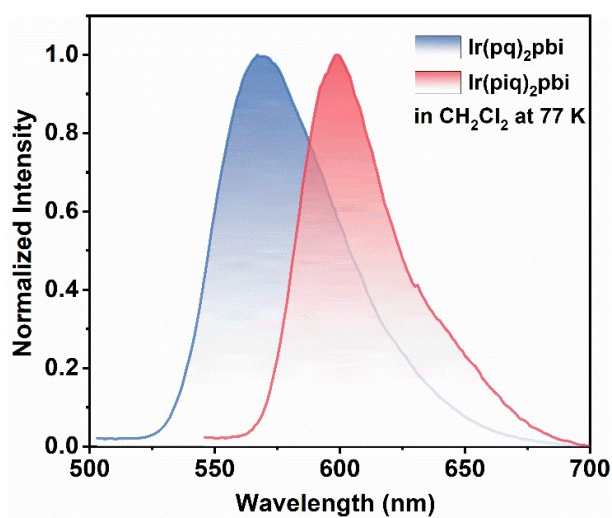

Fig. S8 Normalized PL spectra of  $\text{Ir}(\text{pq})_2\text{pbi}$  and  $\text{Ir}(\text{piq})_2\text{pbi}$  in  $\text{CH}_2\text{Cl}_2$  at 77 K.

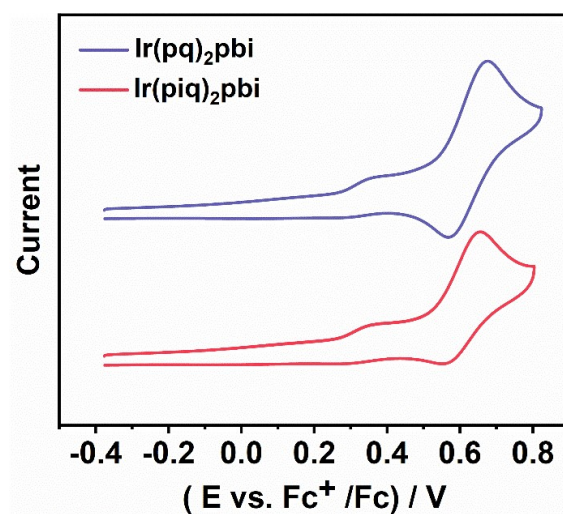

Fig. S9 CV curves of complexes  $\text{Ir}(\text{pq})_2\text{pbi}$  and  $\text{Ir}(\text{piq})_2\text{pbi}$  in  $\text{CH}_2\text{Cl}_2$ .

**Table S3** Excitation energy and major electronic configuration for complexes**Ir(pq)<sub>2</sub>pbi** and **Ir(piq)<sub>2</sub>pbi**.

| Complex                       | $\lambda_{cal}$<br>(nm) | $\lambda_{Expt}$<br>(nm) | $E$ (eV) | Configuration                                         | Assignments                                           | <sup>3</sup> MLCT(%) |
|-------------------------------|-------------------------|--------------------------|----------|-------------------------------------------------------|-------------------------------------------------------|----------------------|
| <b>Ir(pq)<sub>2</sub>pbi</b>  | 545                     | 565                      | 2.28     | H→L (45%)                                             | <sup>3</sup> MLCT/ <sup>3</sup> LLCT                  | 18.61                |
|                               |                         |                          |          | H-3→L (38%)                                           | <sup>3</sup> MLCT/ <sup>3</sup> LC/ <sup>3</sup> LLCT |                      |
| <b>Ir(piq)<sub>2</sub>pbi</b> | 651                     | 594,<br>636              | 1.90     | H→L (64%)                                             | <sup>3</sup> MLCT/ <sup>3</sup> LLCT                  | 17.35                |
|                               |                         | H-3→L (19%)              |          | <sup>3</sup> MLCT/ <sup>3</sup> LC/ <sup>3</sup> LLCT |                                                       |                      |

“H” and “L” denote HOMO and LUMO, respectively.

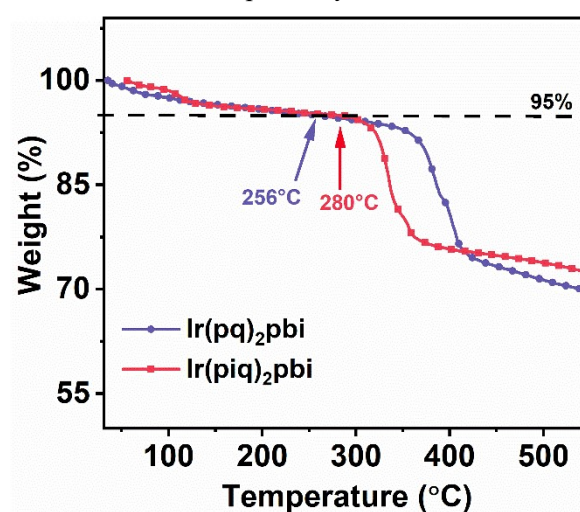**Fig. S10** TGA curves of complexes **Ir(pq)<sub>2</sub>pbi** and **Ir(piq)<sub>2</sub>pbi**.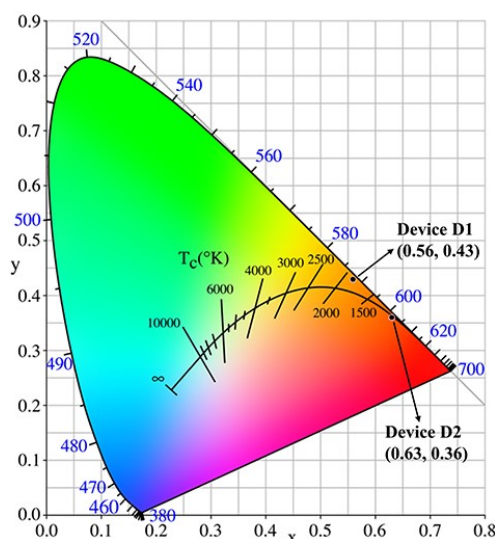**Fig. S11** CIE coordinates of devices **D1** and **D2** based on complexes **Ir(pq)<sub>2</sub>pbi** and

**Ir(piq)<sub>2</sub>pbi** at 6 V.



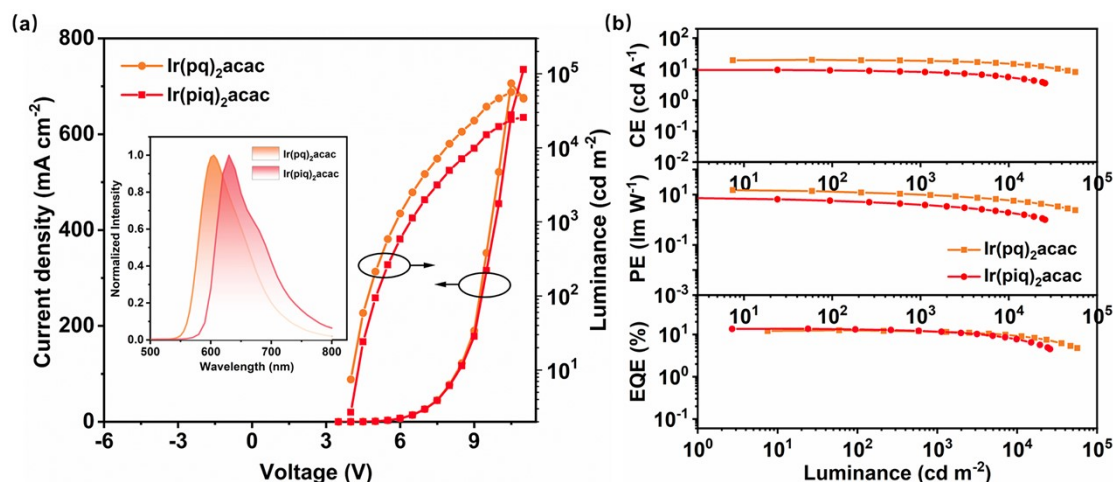

**Fig. S12** (a) J-V-L curves, inset: EL spectra; (b)  $\eta_c$ -L,  $\eta_p$ -L and  $\eta_{ext}$ -L curves for devices based iridium(III) complexes **Ir(pq)<sub>2</sub>acac** and **Ir(piq)<sub>2</sub>acac** [The device structure is ITO/MoO<sub>3</sub> (3 nm)/TAPC (35 nm)/TCTA (5 nm)/26DCzPPy: **Ir(pq)<sub>2</sub>acac** or **Ir(piq)<sub>2</sub>acac** (20 nm)/TmPyPB (55 nm)/LiF (1 nm)/Al].

**Table S4** Summary of device performances of **Ir(pq)<sub>2</sub>acac** and **Ir(piq)<sub>2</sub>acac**.

| Device                         | $V_{turn-on}^a$<br>(V) | $L_{max}$<br>(cd m <sup>-2</sup> ) | $\eta_c^b$<br>(cd A <sup>-1</sup> ) | $\eta_p^b$<br>(lm W <sup>-1</sup> ) | $\eta_{ext}^b$ (%) | CIE <sup>c</sup> (x, y) |
|--------------------------------|------------------------|------------------------------------|-------------------------------------|-------------------------------------|--------------------|-------------------------|
| <b>Ir(pq)<sub>2</sub>acac</b>  | 3.6                    | 56591                              | 19.8/18.5                           | 15.0/9.9                            | 12.5/11.6          | (0.62, 0.37)            |
| <b>Ir(piq)<sub>2</sub>acac</b> | 3.5                    | 25729                              | 9.3/8.0                             | 7.2/3.9                             | 13.6/11.6          | (0.68, 0.31)            |

<sup>a</sup> Turn on the voltage at 1 cd m<sup>-2</sup>; <sup>b</sup> measured efficiency values in the order: maximum, then at 1000 cd m<sup>-2</sup>; <sup>c</sup> Measured at 6 V.

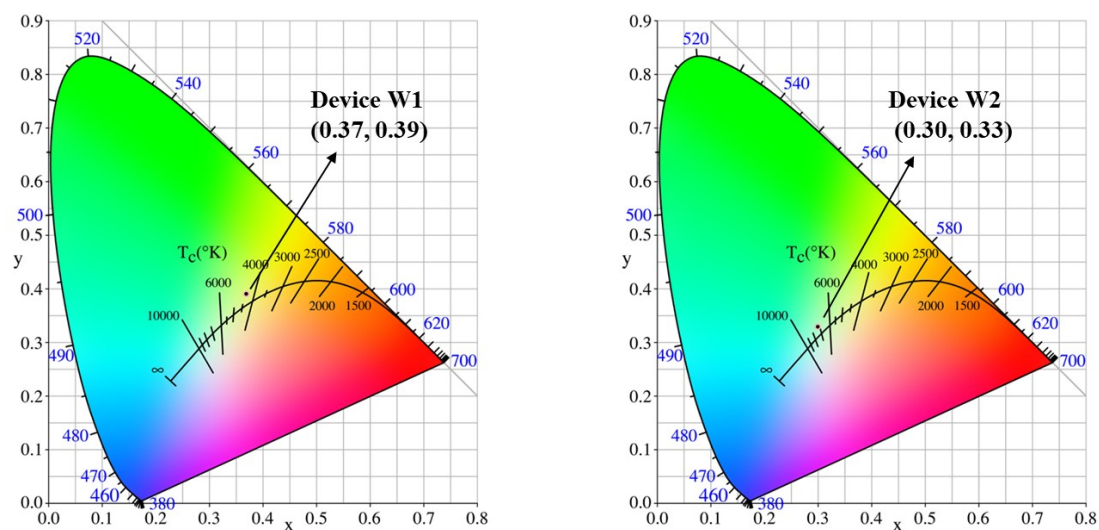

**Fig. S13** CIE coordinates of devices **W1** and **W2** at 6 V.

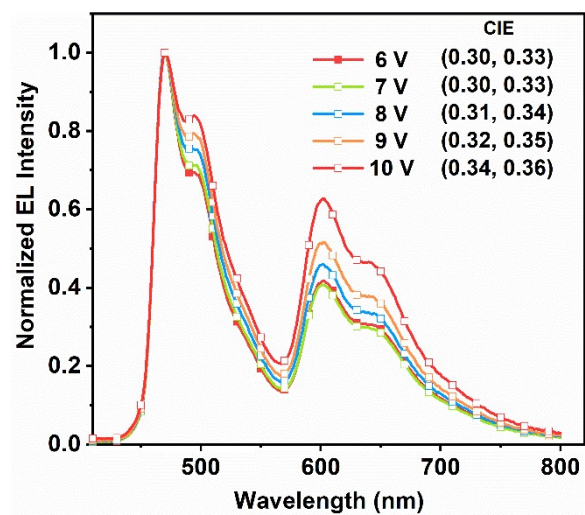

Fig. S14 EL spectra for W2.
